# Supplementary material for: The response of diazotrophs to nutrient amendment in the South China Sea and western North Pacific
Source: Copernicus journal article supplement (doi:10.5194/bg-2022-155), 2022-07-26
Supplement: Supplementary file 1 [file bg-2022-155-supplement.pdf]

## *Supplementary Material*

**Supplementary Table 1.** Quantitative PCR primers and probes used in this study.

| <b>Species/clone</b> | <b>Forward primer</b>          | <b>Probe</b>                         | <b>Reverse primer</b>          | <b>Standard clone</b> | <b>References</b>      |
|----------------------|--------------------------------|--------------------------------------|--------------------------------|-----------------------|------------------------|
| <i>Trichodesmium</i> | GACGAAGTATTGAAG<br>CCAGGTTTC   | CATTAAGTGTGTTGAA<br>TCTGGTGGTCCTGAGC | CGGCCAGCGCAACCTA               | AY528677              | Church et al., 2005a   |
| UCYN-A1              | AGCTATAACAACGTT<br>TTATGCGTTGA | TCTGGTGGTCCTGAGC<br>CTGGA            | ACCACGACCAGCACAT<br>CCA        | AF059642              | Church et al., 2005a   |
| UCYN-A2/A3           | GGTTACAACAACGTT<br>TTATGTGTTGA | TCTGGTGGTCCTGAGC<br>CCGGA            | ACCACGACCAGCACAT<br>CCA        | KF806604              | Thompson et al., 2014  |
| UCYN-B               | TGGTCCTGAGCCTGG<br>AGTTG       | TGTGCTGGTCGTGGTA<br>T                | TCTTCTAGGAAGTTGA<br>TGGAGGTGAT | AF299418              | Church et al., 2005a   |
| het-1                | CGGTTTCCGTGGTGT<br>ACGTT       | TCCGGTGGTCCTGAGC<br>CTGGTGT          | AATACCACGACCCGCA<br>CAAC       | AY706898              | Church et al., 2005b   |
| 24774A11             | CGGTAGAGGATCTTG<br>AGCTTGAA    | AAGTGCTTAAGGTTGG<br>CTTTGGCGACA      | CACCTGACTCCACGCA<br>CTTG       | EU052413              | Moisander et al., 2008 |

**Supplementary Table 2.** Pearson correlation coefficients ( $r$ ) between paired variables including surface temperature (SST) and salinity (SSS), surface chlorophyll  $a$  concentration (Chl  $a$ ), surface  $N_2$  fixation rate (SNF), depth-integrated  $N_2$  fixation rate (INF) and primary production (IPP), and total *nifH* gene abundance. Asterisks denote a significant correlation ( $p < 0.05$ ).

|                           | <b>SSS</b> | <b>Chl <math>a</math></b> | <b>D<sub>Nitr</sub></b> | <b>SNF</b> | <b>INF</b> | <b>IPP</b> | <b><i>nifH</i></b> |
|---------------------------|------------|---------------------------|-------------------------|------------|------------|------------|--------------------|
| <b>SST</b>                | 0.08       | 0.15                      | 0.52                    | 0.32       | 0.52       | -0.67*     | -0.05              |
| <b>SSS</b>                |            | -0.48                     | 0.81*                   | -0.22      | 0.30       | -0.47      | 0.75*              |
| <b>Chl <math>a</math></b> |            |                           | -0.43                   | 0.21       | -0.10      | 0.21       | -0.52              |
| <b>D<sub>Nitr</sub></b>   |            |                           |                         | 0.15       | 0.62       | -0.69*     | 0.74*              |
| <b>SNF</b>                |            |                           |                         |            | 0.68*      | -0.29      | -0.01              |
| <b>INF</b>                |            |                           |                         |            |            | -0.32      | 0.72*              |
| <b>IPP</b>                |            |                           |                         |            |            |            | -0.04              |

**Supplementary Table 3.** Upper 150 m depth-integrated *nifH* gene abundance of six targeted diazotrophs. nd, no data.

| Station               | Depth-integrated <i>nifH</i> gene abundance ( $\times 10^9$ copies $m^{-2}$ ) |         |            |        |       |                    |       |
|-----------------------|-------------------------------------------------------------------------------|---------|------------|--------|-------|--------------------|-------|
|                       | <i>Trichodesmium</i>                                                          | UCYN-A1 | UCYN-A2/A3 | UCYN-B | het-1 | $\gamma$ -24774A11 | Total |
| SEATS <sub>2016</sub> | 2.21                                                                          | 0.72    | 0.009      | 2.02   | 0.00  | 1.01               | 5.96  |
| SEATS <sub>2018</sub> | 6.48                                                                          | 0.01    | 0.10       | 0.78   | 1.33  | 3.84               | 12.5  |
| S1                    | 3.43                                                                          | 0.06    | 0.005      | 3.25   | 0.16  | 0.18               | 7.08  |
| S2                    | 4.01                                                                          | 0.02    | 0.007      | 0.24   | 1.52  | 1.16               | 6.96  |
| S3                    | 35.4                                                                          | 0.05    | 0.005      | 0.16   | 0.08  | 0.99               | 36.7  |
| S4                    | 21.6                                                                          | 0.02    | 0.005      | 0.15   | 0.09  | 0.56               | 22.4  |
| SK1                   | nd                                                                            | nd      | nd         | nd     | nd    | nd                 | nd    |
| SK2                   | nd                                                                            | nd      | nd         | nd     | nd    | nd                 | nd    |
| K1                    | 10.2                                                                          | 17.3    | 1.09       | 12.0   | 0.23  | 3.14               | 44.0  |
| WP                    | 1.73                                                                          | 5.63    | 0.23       | 66.0   | 0.42  | 0.80               | 74.8  |

**Supplementary Table 4.** Intracellular particulate Fe ( $\text{PFe}_{\text{intra}}$ ), total particulate Fe ( $\text{PFe}_{\text{total}}$ ) and particulate organic carbon (POC) concentrations, and particulate Fe to POC ratios in surface waters of the NSCS and the Kuroshio during 2018 cruise.

| <b>Station</b>        | <b><math>\text{PFe}_{\text{intra}}</math><br/>(nM)</b> | <b><math>\text{PFe}_{\text{total}}</math><br/>(nM)</b> | <b>POC<br/>(<math>\mu\text{M}</math>)</b> | <b><math>\text{PFe}_{\text{intra}}:\text{POC}</math><br/>(nmol Fe <math>\mu\text{mol C}^{-1}</math>)</b> | <b><math>\text{PFe}_{\text{total}}:\text{POC}</math><br/>(nmol Fe <math>\mu\text{mol C}^{-1}</math>)</b> |
|-----------------------|--------------------------------------------------------|--------------------------------------------------------|-------------------------------------------|----------------------------------------------------------------------------------------------------------|----------------------------------------------------------------------------------------------------------|
| SEATS <sub>2018</sub> | 1.16                                                   | 1.10                                                   | 2.31                                      | 0.50                                                                                                     | 0.48                                                                                                     |
| S2                    | 0.34                                                   | 0.86                                                   | 2.28                                      | 0.15                                                                                                     | 0.38                                                                                                     |
| S3                    | 0.70                                                   | 0.71                                                   | 2.70                                      | 0.26                                                                                                     | 0.26                                                                                                     |
| S4                    | 0.45                                                   | 1.00                                                   | 3.03                                      | 0.15                                                                                                     | 0.33                                                                                                     |
| SK2                   | 1.34                                                   | 2.40                                                   | 2.46                                      | 0.54                                                                                                     | 0.98                                                                                                     |
| K1                    | 0.62                                                   | 0.94                                                   | 2.14                                      | 0.29                                                                                                     | 0.44                                                                                                     |

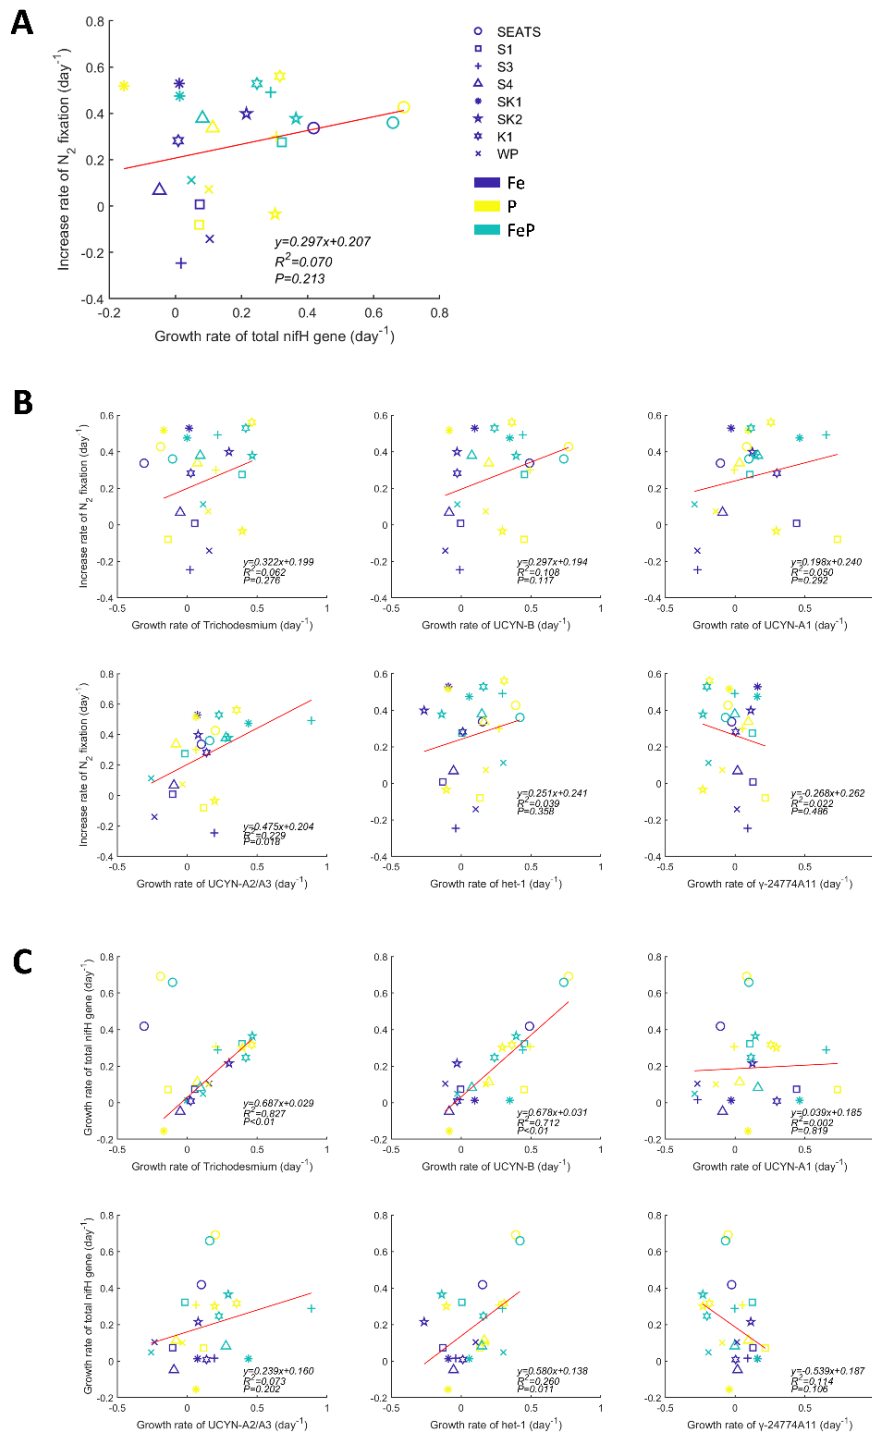

**Supplementary Figure 1.** Correlations of response rates between (A) total *nifH* gene abundances and  $N_2$  fixation rates, (B) individual diazotroph abundances and  $N_2$  fixation rates, and (C) individual diazotroph abundances and total *nifH* gene abundances.

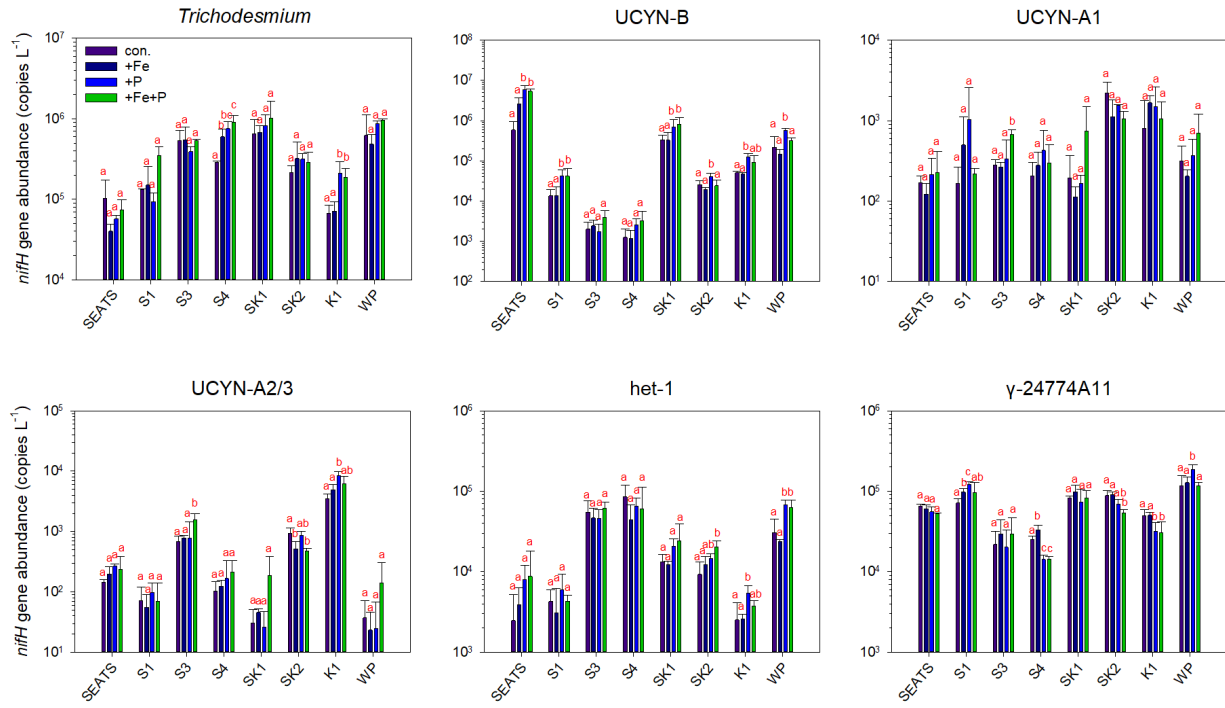

**Supplementary Figure 2.** Responses of different diazotroph phylotypes to nutrient amendment.

The data are mean + SD (n = 2 or 3). Different letters indicate statistically significant difference ( $p < 0.05$ ) among treatments (ANOVA followed by Fisher PLSD test).

**Parameters involved in nitrogen fixation rate calculation**

| <b>Cruise</b> | <b>Date</b> | <b>Station</b> | <b>Long</b> | <b>Lat</b> | <b>Depth</b> | <b>SST</b> |
|---------------|-------------|----------------|-------------|------------|--------------|------------|
| NSCS 2016     | 5/22/16     | SEATS 2016     | 116.067     | 18.017     | 5            | 30.26      |
| NSCS 2016     | 5/22/16     | SEATS 2016     | 116.067     | 18.017     | 15           | 30.25      |
| NSCS 2016     | 5/22/16     | SEATS 2016     | 116.067     | 18.017     | 25           | 29.34      |
| NSCS 2016     | 5/22/16     | SEATS 2016     | 116.067     | 18.017     | 50           | 23.31      |
| NSCS 2016     | 5/22/16     | SEATS 2016     | 116.067     | 18.017     | 75           | 20.91      |
| NSCS 2016     | 5/22/16     | SEATS 2016     | 116.067     | 18.017     | 100          | 19.14      |
| NSCS 2016     | 5/22/16     | SEATS 2016     | 116.067     | 18.017     | 130          | 17.09      |
| NSCS 2017     | 7/23/17     | S1             | 116.503     | 19.502     | 5            | 29.46      |
| NSCS 2017     | 7/23/17     | S1             | 116.503     | 19.502     | 25           | 29.35      |
| NSCS 2017     | 7/23/17     | S1             | 116.503     | 19.502     | 50           | 24.92      |
| NSCS 2017     | 7/23/17     | S1             | 116.503     | 19.502     | 65           | 22.78      |
| NSCS 2017     | 7/23/17     | S1             | 116.503     | 19.502     | 100          | 18.48      |
| NSCS 2017     | 7/13/17     | SK1            | 120.413     | 21.03      | 5            | 30.45      |
| NSCS 2017     | 7/13/17     | SK1            | 120.413     | 21.03      | 25           | 30.25      |
| NSCS 2017     | 7/13/17     | SK1            | 120.413     | 21.03      | 50           | 29.17      |
| NSCS 2017     | 7/13/17     | SK1            | 120.413     | 21.03      | 75           | 28.06      |
| NSCS 2017     | 7/13/17     | SK1            | 120.413     | 21.03      | 100          | 25.17      |
| NSCS 2017     | 7/14/17     | WP             | 123         | 22         | 5            | 30.86      |
| NSCS 2017     | 7/14/17     | WP             | 123         | 22         | 25           | 30.7       |
| NSCS 2017     | 7/14/17     | WP             | 123         | 22         | 50           | 29.8       |
| NSCS 2017     | 7/14/17     | WP             | 123         | 22         | 75           | 27.32      |
| NSCS 2017     | 7/14/17     | WP             | 123         | 22         | 100          | 26.37      |
| NSCS 2018     | 7/6/18      | SEATS 2018     | 116.046     | 17.978     | 5            | 30.27      |
| NSCS 2018     | 7/6/18      | SEATS 2018     | 116.046     | 17.978     | 25           | 29.34      |
| NSCS 2018     | 7/6/18      | SEATS 2018     | 116.046     | 17.978     | 75           | 20.91      |
| NSCS 2018     | 7/6/18      | SEATS 2018     | 116.046     | 17.978     | 88           | 20.05      |
| NSCS 2018     | 7/6/18      | SEATS 2018     | 116.046     | 17.978     | 100          | 19.14      |
| NSCS 2018     | 7/6/18      | SEATS 2018     | 116.046     | 17.978     | 150          | 16.34      |
| NSCS 2018     | 7/1/18      | S2             | 117.94      | 19.57      | 5            | 29.38      |
| NSCS 2018     | 7/1/18      | S2             | 117.94      | 19.57      | 25           | 29.38      |
| NSCS 2018     | 7/1/18      | S2             | 117.94      | 19.57      | 50           | 27.26      |
| NSCS 2018     | 7/1/18      | S2             | 117.94      | 19.57      | 95           | 20.69      |
| NSCS 2018     | 7/1/18      | S2             | 117.94      | 19.57      | 100          | 20.13      |
| NSCS 2018     | 7/1/18      | S2             | 117.94      | 19.57      | 150          | 16.02      |
| NSCS 2018     | 6/23/18     | S3             | 119.34      | 20.86      | 5            | 28.65      |
| NSCS 2018     | 6/23/18     | S3             | 119.34      | 20.86      | 25           | 27.44      |
| NSCS 2018     | 6/23/18     | S3             | 119.34      | 20.86      | 50           | 25.73      |
| NSCS 2018     | 6/23/18     | S3             | 119.34      | 20.86      | 75           | 21.97      |
| NSCS 2018     | 6/23/18     | S3             | 119.34      | 20.86      | 100          | 19.87      |
| NSCS 2018     | 6/23/18     | S3             | 119.34      | 20.86      | 150          | 17.66      |
| NSCS 2018     | 6/25/18     | S4             | 120.05      | 21.54      | 5            | 29.47      |
| NSCS 2018     | 6/25/18     | S4             | 120.05      | 21.54      | 25           | 29.22      |
| NSCS 2018     | 6/25/18     | S4             | 120.05      | 21.54      | 50           | 27.93      |
| NSCS 2018     | 6/25/18     | S4             | 120.05      | 21.54      | 62           | 26.87      |
| NSCS 2018     | 6/25/18     | S4             | 120.05      | 21.54      | 100          | 23.04      |
| NSCS 2018     | 6/25/18     | K1             | 122.5       | 22         | 5            | 29.1189    |
| NSCS 2018     | 6/25/18     | K1             | 122.5       | 22         | 25           | 28.5271    |
| NSCS 2018     | 6/25/18     | K1             | 122.5       | 22         | 50           | 26.3913    |
| NSCS 2018     | 6/25/18     | K1             | 122.5       | 22         | 75           | 25.264     |
| NSCS 2018     | 6/25/18     | K1             | 122.5       | 22         | 100          | 23.2653    |
| NSCS 2018     | 6/25/18     | K1             | 122.5       | 22         | 150          | 22.36      |
| NSCS 2018     | 6/28/18     | SK2            | 121.27      | 21.31      | 5            | no data    |

| SSS     | Chla    | PON <sub>0</sub> | 15N atom% enrichment of PON <sub>0</sub> | PON <sub>24h</sub> concentration (μM) | 15N atom% enrichment of PON <sub>24h</sub> | NFR     |
|---------|---------|------------------|------------------------------------------|---------------------------------------|--------------------------------------------|---------|
| 33.46   | 0.26    | no data          | no data                                  | 0.38                                  | 0.3816805                                  | 1.1     |
| 33.46   | 0.26    | no data          | no data                                  | 0.37                                  | 0.3798570                                  | 2.0     |
| 33.62   | 0.30    | no data          | no data                                  | 0.33                                  | 0.3708272                                  | 0.5     |
| 34.36   | 0.45    | no data          | no data                                  | 0.31                                  | 0.3750863                                  | 0.3     |
| 34.56   | 0.61    | no data          | no data                                  | 0.64                                  | 0.3674203                                  | 0.2     |
| 34.65   | 0.31    | no data          | no data                                  | 0.17                                  | 0.3701849                                  | 0.2     |
| 34.64   | no data | no data          | no data                                  | 0.10                                  | 0.3741270                                  | 0.3     |
| 33.73   | 0.24    | 0.33             | 0.3668207                                | 0.43                                  | 0.3767814                                  | 0.8     |
| 33.71   | 0.37    | 0.42             | 0.3669390                                | 0.58                                  | 0.3686309                                  | 0.8     |
| 34.44   | 0.84    | 0.67             | 0.3674356                                | 0.88                                  | 0.3683459                                  | 0.6     |
| 34.54   | 0.98    | 0.48             | 0.3669079                                | no data                               | no data                                    | no data |
| 34.66   | 0.15    | 0.19             | 0.3680782                                | 0.20                                  | 0.3677434                                  | 0.0     |
| 33.62   | 0.22    | no data          | no data                                  | 0.33                                  | 0.3943007                                  | 10.4    |
| 33.75   | 0.21    | no data          | no data                                  | 0.34                                  | 0.3799960                                  | 3.5     |
| 34.11   | no data | no data          | no data                                  | 0.57                                  | 0.3893380                                  | 5.4     |
| 34.32   | no data | no data          | no data                                  | 0.63                                  | 0.4776194                                  | 2.6     |
| 34.57   | no data | no data          | no data                                  | 0.66                                  | 0.3688654                                  | 0.2     |
| 34.47   | 0.11    | 0.23             | 0.36781801                               | 0.37                                  | 0.382999743                                | 1.9     |
| 34.41   | 0.11    | 0.23             | 0.36801961                               | 0.24                                  | 0.440051932                                | 3.3     |
| 34.53   | 0.13    | 0.25             | 0.36856696                               | 0.28                                  | 0.438787892                                | 7.9     |
| 34.89   | 0.17    | 0.18             | 0.36801961                               | 0.21                                  | 0.467344503                                | 4.0     |
| 34.96   | 0.29    | 0.21             | 0.37211872                               | 0.24                                  | 0.373643014                                | 0.1     |
| 33.46   | 0.11    | 0.25             | 0.36588618                               | 0.27                                  | 0.376683576                                | 1.8     |
| 33.62   | 0.13    | 0.29             | 0.36654193                               | 0.29                                  | 0.376494591                                | 2.1     |
| 34.56   | 0.65    | 0.47             | 0.36696012                               | 0.42                                  | 0.367307142                                | 0.3     |
| 34.61   | 0.60    | 0.28             | 0.36504468                               | 0.30                                  | 0.366694829                                | 0.3     |
| 34.65   | 0.51    | 0.37             | 0.36525123                               | 0.25                                  | 0.366694099                                | 0.3     |
| 34.62   | 0.07    | 0.11             | 0.36663827                               | 0.10                                  | 0.368374111                                | 0.1     |
| 33.75   | 0.10    | 0.25             | 0.36629562                               | 0.26                                  | 0.385884928                                | 3.0     |
| 33.78   | 0.12    | 0.25             | 0.36631459                               | 0.32                                  | 0.380279581                                | 2.1     |
| 33.98   | 0.27    | 0.32             | 0.36698311                               | 0.36                                  | 0.367273154                                | 0.0     |
| 34.67   | 0.53    | 0.22             | 0.36589932                               | 0.30                                  | 0.366632742                                | 0.2     |
| 34.7    | 0.35    | 0.19             | 0.36612192                               | 0.22                                  | 0.367169886                                | 0.1     |
| 34.61   | 0.05    | 0.13             | 0.36758702                               | 0.10                                  | 0.367449038                                | 0.0     |
| 33.53   | 0.15    | 0.41             | 0.36610039                               | 0.56                                  | 0.371222007                                | 2.4     |
| 33.73   | 0.17    | 0.41             | 0.36840695                               | 0.29                                  | 0.385794335                                | 5.9     |
| 34.05   | 0.78    | 0.50             | 0.36706959                               | 0.48                                  | 0.3679406                                  | 0.5     |
| 34.58   | 0.79    | 0.47             | 0.37048536                               | 0.66                                  | 0.371195082                                | 0.0     |
| 34.77   | 0.26    | 0.21             | 0.36691706                               | 0.21                                  | 0.366320972                                | 0.0     |
| 34.72   | 0.07    | 0.09             | 0.36833251                               | 0.09                                  | 0.366939499                                | 0.0     |
| 33.74   | 0.17    | 0.56             | 0.36740275                               | 0.43                                  | 0.371252697                                | 1.8     |
| 33.74   | 0.13    | nd               | 0.36662075                               | 0.38                                  | 0.38311794                                 | 6.1     |
| 33.92   | 0.50    | 0.59             | 0.36729218                               | 0.42                                  | 0.376236431                                | 4.4     |
| 33.88   | 0.59    | 0.40             | 0.37216232                               | 0.42                                  | 0.3759452                                  | 0.0     |
| 34.45   | 0.21    | 0.32             | 0.36821392                               | 0.26                                  | 0.367758162                                | 0.0     |
| 34.4468 | 0.11    | 0.21             | 0.36537165                               | 0.28                                  | 0.368736205                                | 0.8     |
| 34.5194 | 0.10    | 0.27             | 0.36547419                               | 0.27                                  | 0.372847664                                | 1.9     |
| 34.6763 | 0.12    | 0.28             | 0.36515927                               | 0.29                                  | 0.373097594                                | 2.2     |
| 34.7557 | 0.34    | 0.33             | 0.36576248                               | 0.29                                  | 0.366441681                                | 0.3     |
| 34.8755 | 0.07    | 0.29             | 0.36573036                               | 0.27                                  | 0.365967681                                | 0.1     |
| 34.902  | 0.20    | 0.14             | 0.3675166                                | 0.14                                  | 0.366298654                                | 0.0     |
| no data | 0.11    | 0.28             | 0.36665797                               | 0.19                                  | 0.375381825                                | 2.0     |



| <b>SD<sub>NFR</sub></b> | <b>NFR_LOD<br/>[nmol N L<sup>-1</sup> d<sup>-1</sup>]</b> | <b>PP</b> | <b>SD<sub>PP</sub><br/>[μmol C L<sup>-1</sup> d<sup>-1</sup>]</b> | <b>Trichodesmium</b> |
|-------------------------|-----------------------------------------------------------|-----------|-------------------------------------------------------------------|----------------------|
|                         | 0.23                                                      | 0.59      | 0.00                                                              | 5.57E+04             |
| 0.04                    | 0.23                                                      | 0.48      | 0.02                                                              | 6.60E+04             |
| 0.34                    | 0.20                                                      | 0.25      | 0.02                                                              | 5.68E+04             |
|                         | 0.14                                                      | 0.38      | 0.05                                                              | 0.00E+00             |
| 0.03                    | 0.39                                                      | 0.01      | 0.00                                                              | 0.00E+00             |
| 0.05                    | 0.10                                                      | 0.01      | 0.00                                                              | 0.00E+00             |
| 0.17                    | 0.06                                                      | 0.00      | 0.00                                                              | 0.00E+00             |
| 0.00                    | 0.54                                                      | 0.37      | 0.03                                                              | 1.97E+05             |
| 0.05                    | 0.71                                                      | 0.48      | 0.01                                                              | 1.98E+04             |
| 0.32                    | 0.99                                                      | 0.69      | 0.04                                                              | 9.48E+02             |
| no data                 | no data                                                   | no data   | no data                                                           | 2.31E+02             |
| 0.00                    | 0.48                                                      | 0.02      | 0.00                                                              | 2.97E+02             |
| 0.01                    | 0.29                                                      | 0.08      | 0.01                                                              | no data              |
| 0.00                    | 0.22                                                      | 0.09      | 0.01                                                              | no data              |
| 0.00                    | 0.36                                                      | 0.11      | 0.12                                                              | no data              |
| 0.00                    | 0.40                                                      | 0.16      | 0.01                                                              | no data              |
| 0.17                    | 0.42                                                      | 0.05      | 0.02                                                              | no data              |
| 0.74                    | 0.19                                                      | 0.12      | 0.02                                                              | 1.02E+03             |
| 0.00                    | 0.15                                                      | 0.09      | 0.01                                                              | 1.19E+03             |
| 0.43                    | 0.17                                                      | 0.11      | 0.01                                                              | 4.30E+03             |
| 0.00                    | 0.12                                                      | 0.07      | 0.00                                                              | 3.28E+03             |
| 0.00                    | 0.14                                                      | 0.06      | 0.02                                                              | 1.20E+05             |
| 0.11                    | 0.23                                                      | 0.30      | 0.01                                                              | 1.76E+05             |
| 0.40                    | 0.26                                                      | 0.29      | 0.01                                                              | 1.09E+05             |
| 0.25                    | 0.40                                                      | 0.14      | 0.02                                                              | 7.46E+02             |
| 0.05                    | 0.26                                                      | 0.11      | 0.02                                                              | 2.20E+02             |
| 0.02                    | 0.28                                                      | 0.10      | 0.02                                                              | 0.00E+00             |
| 0.02                    | 0.10                                                      | 0.01      | 0.00                                                              | no data              |
| 0.01                    | 0.23                                                      | 0.22      | 0.01                                                              | 1.78E+05             |
| 0.33                    | 0.25                                                      | 0.26      | 0.01                                                              | 5.73E+04             |
| 0.02                    | 0.30                                                      | 0.27      | 0.04                                                              | 1.02E+03             |
| 0.06                    | 0.23                                                      | 0.11      | 0.00                                                              | 5.16E+02             |
| 0.01                    | 0.19                                                      | 0.07      | 0.00                                                              | 0.00E+00             |
| 0.04                    | 0.10                                                      | 0.01      | 0.00                                                              | no data              |
| 1.20                    | 0.69                                                      | 0.61      | 0.09                                                              | 8.00E+05             |
| 1.23                    | 0.50                                                      | 0.39      | 0.09                                                              | 9.07E+05             |
| 0.67                    | 0.69                                                      | 1.04      | 0.01                                                              | 9.54E+04             |
| 0.00                    | 0.76                                                      | 1.71      | 0.10                                                              | 2.63E+04             |
| 0.02                    | 0.30                                                      | 0.28      | 0.02                                                              | 0.00E+00             |
| 0.00                    | 0.13                                                      | 0.03      | 0.00                                                              | no data              |
| 0.31                    | 0.70                                                      | 0.41      | 0.03                                                              | 4.22E+05             |
| 0.38                    | 0.54                                                      | 0.80      | 0.11                                                              | 4.95E+05             |
| 1.50                    | 0.72                                                      | 0.85      | 0.11                                                              | 2.01E+05             |
| 0.00                    | 0.58                                                      | 0.66      | 0.01                                                              | 1.53E+04             |
| 0.00                    | 0.41                                                      | 0.11      | 0.04                                                              | 0.00E+00             |
| 0.21                    | 0.34                                                      | 0.20      | 0.01                                                              | 1.29E+05             |
| 0.13                    | 0.38                                                      | 0.18      | 0.00                                                              | 2.23E+05             |
| 0.23                    | 0.40                                                      | 0.21      | 0.00                                                              | 1.18E+05             |
| 0.48                    | 0.44                                                      | 0.22      | 0.01                                                              | 1.18E+04             |
| 0.06                    | 0.39                                                      | 0.09      | 0.00                                                              | 8.93E+02             |
| 0.00                    | 0.20                                                      | 0.02      | 0.00                                                              | 2.11E+02             |
| 0.00                    | 0.34                                                      | 0.26      | 0.00                                                              | 1.37E+05             |

| UCYN-B   | UCYN-A1  | UCYN-A2/A3 | het-1    | $\gamma$ -24774A11 |
|----------|----------|------------|----------|--------------------|
| 4.16E+04 | 6.34E+02 | 8.93E+02   | 0.00E+00 | 1.26E+04           |
| 5.42E+04 | 0.00E+00 | 0.00E+00   | 0.00E+00 | 3.45E+04           |
| 6.04E+04 | 8.71E+03 | 0.00E+00   | 0.00E+00 | 0.00E+00           |
| 0.00E+00 | 2.23E+04 | 0.00E+00   | 0.00E+00 | 1.75E+03           |
| 0.00E+00 | 0.00E+00 | 0.00E+00   | 0.00E+00 | 1.57E+04           |
| 0.00E+00 | 0.00E+00 | 0.00E+00   | 0.00E+00 | 8.25E+03           |
| 0.00E+00 | 0.00E+00 | 0.00E+00   | 0.00E+00 | 9.08E+03           |
| 2.11E+05 | 2.94E+02 | 9.83E+01   | 1.15E+03 | 5.63E+03           |
| 1.13E+03 | 4.87E+02 | 2.64E+01   | 4.83E+02 | 2.23E+03           |
| 4.61E+02 | 4.91E+02 | 3.70E+01   | 5.75E+03 | 7.96E+02           |
| 1.09E+03 | 5.54E+02 | 3.65E+01   | 3.23E+02 | 4.12E+02           |
| 1.23E+03 | 1.17E+03 | 6.50E+01   | 4.48E+02 | 1.00E+03           |
| no data  | no data  | no data    | no data  | no data            |
| no data  | no data  | no data    | no data  | no data            |
| no data  | no data  | no data    | no data  | no data            |
| no data  | no data  | no data    | no data  | no data            |
| no data  | no data  | no data    | no data  | no data            |
| 8.67E+05 | 7.80E+02 | 3.93E+01   | 9.00E+01 | 6.70E+03           |
| 9.52E+05 | 3.97E+03 | 1.09E+03   | 2.76E+02 | 3.73E+03           |
| 7.99E+05 | 2.62E+04 | 5.38E+02   | 1.17E+04 | 9.91E+03           |
| 4.54E+05 | 1.58E+05 | 6.87E+03   | 4.67E+03 | 1.07E+04           |
| 2.17E+04 | 7.52E+04 | 1.73E+03   | 3.69E+02 | 7.61E+03           |
| 5.77E+03 | 1.51E+02 | 4.53E+02   | 1.80E+04 | 7.17E+04           |
| 1.81E+04 | 1.67E+02 | 2.75E+03   | 2.96E+04 | 7.79E+04           |
| 1.58E+03 | 8.94E+01 | 1.48E+01   | 5.76E+02 | 8.01E+02           |
| 5.10E+02 | 1.68E+01 | 0.00E+00   | 1.54E-01 | 6.66E+02           |
| 0.00E+00 | 0.00E+00 | 0.00E+00   | 0.00E+00 | 0.00E+00           |
| no data  | no data  | no data    | no data  | no data            |
| 8.25E+03 | 7.71E+02 | 2.79E+02   | 7.61E+04 | 3.79E+04           |
| 3.73E+03 | 1.40E+02 | 3.71E+01   | 1.62E+04 | 1.97E+04           |
| 6.28E+02 | 3.91E+01 | 3.62E+01   | 2.93E+02 | 3.98E+03           |
| 3.59E+02 | 2.08E+02 | 3.35E+01   | 2.93E+02 | 3.07E+02           |
| 0.00E+00 | 0.00E+00 | 0.00E+00   | 0.00E+00 | 0.00E+00           |
| no data  | no data  | no data    | no data  | no data            |
| 7.30E+02 | 4.24E+01 | 6.43E+01   | 1.65E+03 | 1.28E+04           |
| 4.39E+03 | 5.02E+02 | 1.26E+02   | 1.29E+03 | 1.56E+04           |
| 1.14E+03 | 7.85E+02 | 1.57E+01   | 6.34E+02 | 5.54E+03           |
| 9.42E+02 | 8.44E+02 | 3.42E+01   | 2.70E+02 | 1.23E+04           |
| 0.00E+00 | 0.00E+00 | 0.00E+00   | 0.00E+00 | 0.00E+00           |
| no data  | no data  | no data    | no data  | no data            |
| 2.30E+02 | 5.67E+01 | 2.96E+01   | 1.09E+03 | 1.17E+04           |
| 4.45E+03 | 4.87E+01 | 1.34E+02   | 2.45E+03 | 1.11E+04           |
| 1.81E+03 | 2.63E+02 | 5.39E+01   | 8.28E+02 | 4.05E+03           |
| 5.33E+02 | 6.09E+02 | 2.24E+00   | 1.38E+02 | 2.53E+03           |
| 0.00E+00 | 0.00E+00 | 0.00E+00   | 0.00E+00 | 0.00E+00           |
| 6.55E+04 | 2.30E+03 | 1.55E+03   | 2.44E+03 | 4.39E+04           |
| 2.64E+05 | 8.55E+04 | 1.46E+04   | 4.53E+03 | 5.61E+04           |
| 1.94E+05 | 6.09E+05 | 2.95E+04   | 2.04E+03 | 4.51E+04           |
| 5.99E+03 | 5.27E+03 | 1.06E+02   | 6.17E+02 | 3.18E+03           |
| 2.77E+03 | 2.39E+03 | 6.83E+01   | 1.58E+03 | 6.86E+02           |
| 2.76E+03 | 8.90E+02 | 7.58E+01   | 8.16E+02 | 3.84E+02           |
| 2.24E+04 | 5.72E+02 | 2.81E+02   | 1.69E+04 | 1.96E+04           |

## References

- Church, M. J., Jenkins, B. D., Karl, D. M., and Zehr, J. P.: Vertical distributions of nitrogen fixing phylotypes at Stn ALOHA in the oligotrophic North Pacific Ocean, *Aquat. Microb. Ecol.*, 38, 3-14, 10.3354/ame038003 2005a.
- Church, M. J., Short, C. M., Jenkins, B. D., Karl, D. M., and Zehr, J. P.: Temporal patterns of nitrogenase gene (*nifH*) expression in the oligotrophic North Pacific Ocean, *Appl. Environ. Microbiol.*, 71, 5362-5370, 10.1128/AEM.71.9.5362-5370.2005, 2005b.
- Moisander, P. H., Beinart, R. A., Voss, M., and Zehr, J. P.: Diversity and abundance of diazotrophic microorganisms in the South China Sea during intermonsoon, *Isme J*, 2, 954-967, 10.1038/ismej.2008.51, 2008.
- Thompson, A. W., Carter, B. J., Turk-Kubo, K. A., Malfatti, F., Azam, F., and Zehr, J. P.: Genetic diversity of the unicellular nitrogen-fixing cyanobacteria UCYN-A and its prymnesiophyte host, *Environ. Microbiol.*, 16, 3238-3249, 10.1111/1462-2920.12490, 2014.
